# Supplementary material
Source: Springer Nature journal article supplement (https://www.springermedizin.de/resource/supplementary/12992_2004_13_MOESM2_ESM.pdf/9616142)

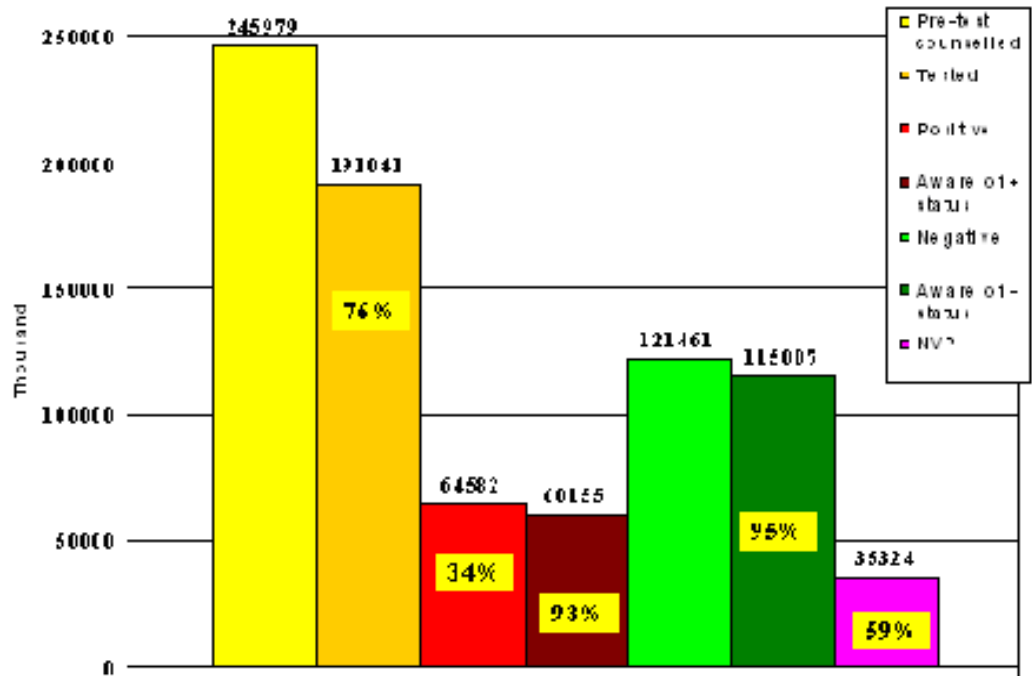

Supplement: MOESM2 [file 9616142]
